# Supplementary material for: Self-assembled RNAi nanoflowers via rolling circle transcription for aptamer-targeted siRNA delivery
Source: Royal Society of Chemistry journal article supplement (doi:10.1039/c8tb00758f), 2018-01-01
Supplement: c8tb00758f1.pdf [file c8tb00758f1.pdf]

**Electronic Supplementary Information**

*of*

**Self-assembled RNAi nanoflowers via rolling circle transcription for  
aptamer-targeted siRNA delivery**

*Hui Cheng,<sup>a,b,#</sup> Shanni Hong,<sup>a,#</sup> Zhili Wang,<sup>a</sup> Na Sun,<sup>a</sup> Tengfei Wang,<sup>a</sup> Ye Zhang,<sup>a</sup> Hongxia Chen<sup>b</sup> and*

*Renjun Pei<sup>a\*</sup>*

<sup>a</sup>CAS Key Laboratory of Nano-Bio Interface, Suzhou Institute of Nano-Tech and Nano-Bionics,  
Chinese Academy of Sciences, Suzhou 215123, China. E-mail: rjpei2011@sinano.ac.cn.

<sup>b</sup>College of Life Sciences, Shanghai University, Shanghai 200444, China.

# These authors contribute equally.

Table S1. Oligonucleotide sequences

| Strand                        | Sequence                                                                                                                                                       |
|-------------------------------|----------------------------------------------------------------------------------------------------------------------------------------------------------------|
| Linear ssDNA template         | 5'-<br><b>ATAGTGAGTCGTATTAACGTACCAACAA</b> <b>GTA</b><br><b>CATCCATTATAAGCTGTC</b> ACTTGGACAGCTTATAATGGATGT<br>ACTTTATCTTAGAGGCATAT <b>CCCT</b> -3' Phosphate- |
| T7 promoter primer            | 5'- <b>TAATACGACTCACTATAGGGAT</b> -3'                                                                                                                          |
| DNA-Chol                      | 5'- <b>ATAGTGAGTCGTATTAACGTACCAACAA</b> -3'-cholesterol                                                                                                        |
| AS1411-DNA                    | 5'-<br>TTTATCTTAGAGGCATAT <b>CCCT</b> AAAAAAAAAAGGTGGTGGTG<br>GTTGTGGTGGTGGTGG-3'                                                                              |
| anti-Bcl-2 siRNA duplex       | 5'- <b>GUACAUCCAUAUAAGCUGTU</b> -3'<br>3'- <b>CAUGUAGGUAAUAUUCGACAG</b> -5'                                                                                    |
| Bcl-2 forward primer          | 5'-CGACTTTGCAGAGATGTCCA-3'                                                                                                                                     |
| Bcl-2 reverse primer          | 5'-ATGCCGGTTCAGGTA CT CAG-3'                                                                                                                                   |
| $\beta$ -actin forward primer | 5'-TGGCACCACACCTTCTACAATG-3'                                                                                                                                   |
| $\beta$ -actin reverse primer | 5'-TCTCAAACATGATCTGGGTCATCT-3'                                                                                                                                 |

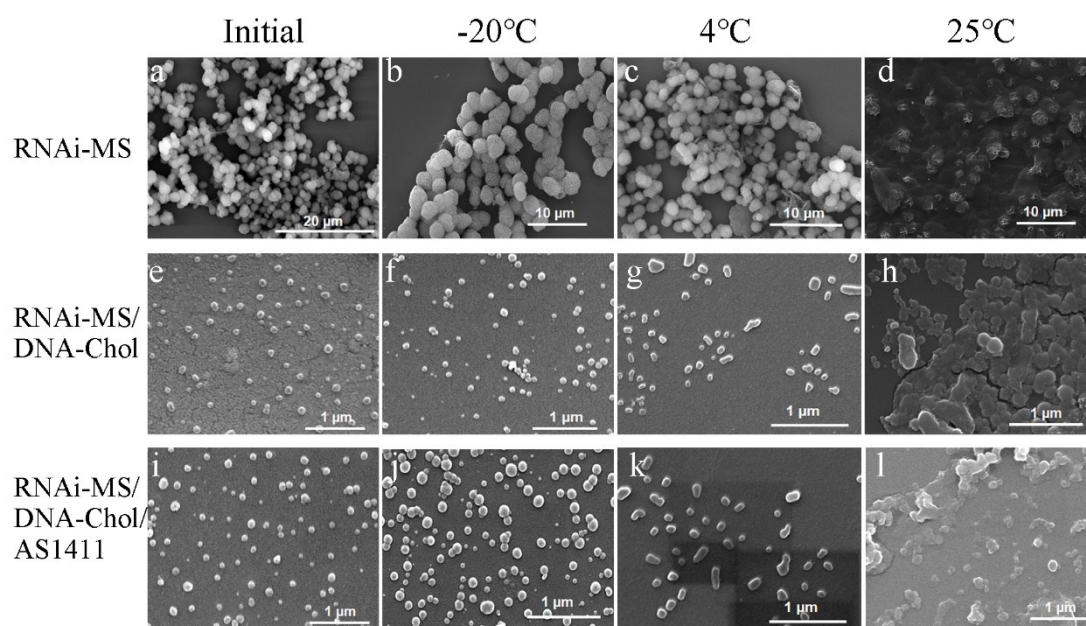

Figure S1. SEM images demonstrating the thermal stability of RNAi-MS, RNAi-MS/DNA-Chol and RNAi-MS/DNA-Chol/AS1411 after being stored at three temperatures (-20°C, 4°C and 25°C) for 30 days.

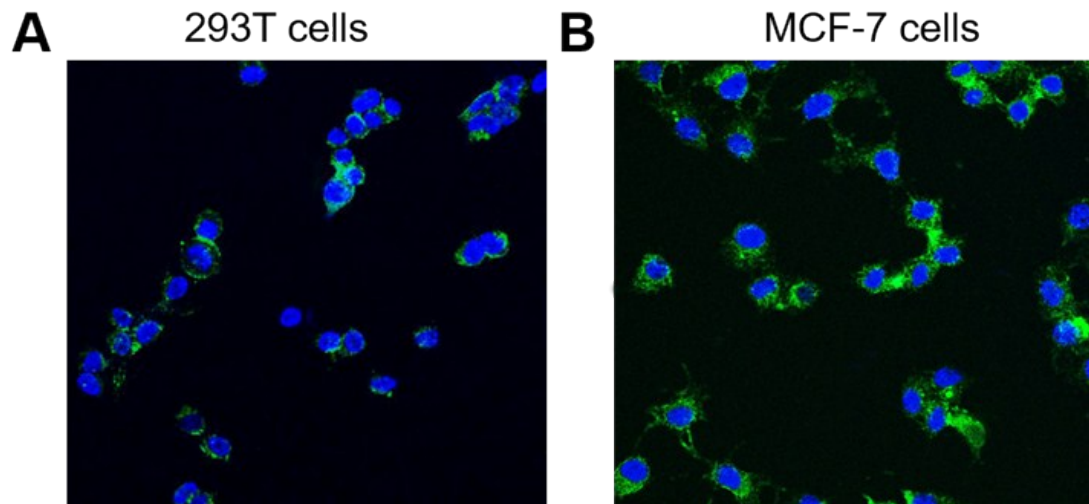

Figure S2. The specificity of AS1411 containing RNAi-NS towards different cell lines. AS1411 containing RNAi-NS were incubated with 293T cells (A) and MCF-7 cells (B) respectively. After 3 h, the fluorescence images were obtained by a fluorescence microscope with a CCD camera. Green and blue signals represent the fluorescence FAM-labelled RNAi particles and Hoechst dyes.
